# Supplementary material for: Is the bioconformation of 5-deoxy-5-fluoro-d-xylulose affected by intramolecular hydrogen bonds?
Source: Royal Society of Chemistry journal article supplement (doi:10.1039/c6ra23423b), 2016-01-01
Supplement: c6ra23423b1.pdf [file c6ra23423b1.pdf]

## ELECTRONIC SUPPLEMENTARY INFORMATION (ESI)

### Is the bioconformation of 5-deoxy-5-fluoro-D-xylulose affected by intramolecular hydrogen bond?

Maria C. Guimarães, Josué M. Silla, Elaine F. F. da Cunha, Teodorico C. Ramalho,

Matheus P. Freitas\*

*Department of Chemistry, Federal University of Lavras, 37200-000, Lavras, MG, Brazil*

\* corresponding author: matheus@dqi.ufla.br

**Page 1. Table S1.** Optimized conformations for DFX in the gas phase at the  $\omega$ B97X-D/6-311++g(d,p) level and respective free energies (kcal mol<sup>-1</sup>) and key dihedral angles.

**Page 3. Table S2.** Optimized conformations for DFX in implicit water at the  $\omega$ B97X-D/6-311++g(d,p) level and respective free energies (kcal mol<sup>-1</sup>) and key dihedral angles.

**Page 5-22.** Standard coordinates

**Table S1.** Optimized conformations for DFX in the gas phase at the  $\omega$ B97X-D/6-311++g(d,p) level and respective free energies (kcal mol<sup>-1</sup>) and key dihedral angles.

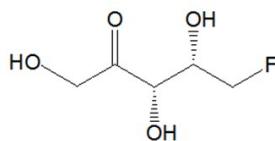

| Conf | $\Delta G^{\circ}_{rel}$ | HOC(H <sub>2</sub> )C(=O) | OCC=O  | O=CCO(H) | C(=O)COH | (H)OCCO(H) | HOCC(F) | OCCF   |
|------|--------------------------|---------------------------|--------|----------|----------|------------|---------|--------|
| 1g   | 0.00                     | -16.8                     | 12.2   | 9.4      | -13.4    | 57.9       | 76.2    | 173.4  |
| 2g   | 0.22                     | 9.6                       | -4.8   | -6.3     | 2.1      | -166.4     | -55.3   | 62.2   |
| 3g   | 0.38                     | 4.0                       | -1.7   | 174.7    | 84.0     | 52.3       | -51.0   | 56.8   |
| 4g   | 0.47                     | 69.8                      | 159.2  | -11.1    | 6.2      | -171.3     | -53.5   | 60.1   |
| 5g   | 0.78                     | -1.2                      | 0.6    | 176.7    | 164.2    | -48.8      | -56.1   | 57.7   |
| 6g   | 1.00                     | -16.6                     | 10.8   | 101.6    | 5.1      | 74.9       | -46.9   | 60.0   |
| 7g   | 1.06                     | 4.1                       | -1.7   | 177.6    | -172.9   | 48.6       | 81.7    | -73.5  |
| 8g   | 1.31                     | -2.9                      | 1.5    | 172.6    | 153.8    | -42.2      | 40.7    | -54.2  |
| 9g   | 1.32                     | -18.0                     | 12.1   | 10.1     | -13.5    | 66.7       | 64.8    | 65.2   |
| 10g  | 1.34                     | 0.9                       | -3.0   | -159.3   | 83.1     | 51.9       | -145.1  | 178.8  |
| 11g  | 1.51                     | 1.7                       | -3.6   | -151.5   | 81.9     | 53.4       | -148.7  | 179.0  |
| 12g  | 1.58                     | -55.5                     | 156.9  | -110.7   | 48.1     | 70.9       | -51.5   | 57.8   |
| 13g  | 1.71                     | 5.4                       | -1.8   | 177.7    | -133.4   | 50.9       | 73.6    | 175.7  |
| 14g  | 1.76                     | 2.7                       | -2.9   | -171.9   | 83.1     | -163.5     | 76.0    | -176.5 |
| 15g  | 1.80                     | -9.0                      | 6.2    | -105.9   | 82.2     | 72.6       | -166.3  | 176.9  |
| 16g  | 2.07                     | -10.2                     | 4.1    | 2.0      | -3.0     | -170.9     | -159.7  | -64.8  |
| 17g  | 2.26                     | 19.1                      | -13.2  | -32.6    | 31.0     | -54.3      | 169.2   | -75.9  |
| 18g  | 2.39                     | 66.9                      | -142.9 | 1.9      | -4.7     | -156.4     | 76.4    | -67.3  |
| 19g  | 2.57                     | -11.9                     | 8.5    | 0.8      | 8.4      | 70.3       | -60.9   | 172.7  |
| 20g  | 2.66                     | 5.8                       | -7.5   | -34.2    | 31.0     | -53.9      | 168.4   | 165.9  |
| 21g  | 2.68                     | 7.5                       | -1.5   | -179.2   | -154.8   | -175.0     | 81.5    | -68.5  |
| 22g  | 2.70                     | -56.1                     | -179.6 | -115.9   | 81.4     | 50.4       | -163.5  | 178.0  |
| 23g  | 2.83                     | 86.8                      | -179.6 | -26.7    | 24.4     | -47.8      | 164.1   | 169.4  |
| 24g  | 2.83                     | 65.0                      | 168.5  | -5.1     | 1.9      | -161.6     | -159.4  | -60.9  |
| 25g  | 2.85                     | -71.9                     | -113.2 | -0.1     | -2.4     | -164.9     | -61.6   | 62.4   |
| 26g  | 2.88                     | -61.7                     | -157.1 | -136.6   | 158.0    | -43.8      | 42.1    | -55.8  |
| 27g  | 2.97                     | 65.8                      | 139.3  | 157.8    | 166.3    | -50.7      | -59.6   | 59.7   |
| 28g  | 2.97                     | 3.4                       | -3.9   | -152.5   | 164.9    | 55.2       | -165.4  | -72.8  |
| 29g  | 3.13                     | -82.0                     | 174.7  | -3.3     | 1.0      | -154.7     | 77.9    | -63.7  |
| 30g  | 3.15                     | -64.3                     | -150.8 | -142.3   | 164.0    | -47.7      | -56.2   | 56.3   |
| 31g  | 3.21                     | -82.7                     | 152.9  | -3.9     | 12.7     | 75.7       | -48.9   | 60.6   |
| 32g  | 3.63                     | 5.1                       | -5.0   | -156.0   | -157.6   | 74.8       | -164.8  | -169.3 |
| 33g  | 3.66                     | 67.2                      | 138.1  | 158.0    | 160.4    | -45.5      | 40.0    | -52.7  |
| 34g  | 3.71                     | 7.2                       | -3.1   | -174.9   | 63.5     | -174.8     | 84.9    | -83.0  |
| 35g  | 3.83                     | -65.2                     | 139.3  | 168.9    | 38.8     | -169.7     | 90.0    | -69.5  |

|            |       |        |        |        |        |        |        |        |
|------------|-------|--------|--------|--------|--------|--------|--------|--------|
| <b>36g</b> | 3.91  | -53.7  | 153.5  | 152.6  | 47.0   | 68.8   | -70.2  | 171.8  |
| <b>37g</b> | 4.11  | 7.4    | -2.7   | 164.5  | -77.1  | 70.0   | -54.8  | 62.1   |
| <b>38g</b> | 4.24  | 0.3    | -1.4   | -163.4 | -163.9 | -167.3 | 68.4   | 70.9   |
| <b>39g</b> | 4.35  | -66.3  | -131.5 | -166.7 | -174.1 | 49.0   | 82.0   | -73.9  |
| <b>40g</b> | 4.40  | -66.4  | -131.4 | -166.7 | -74.2  | 49.0   | 81.8   | -73.9  |
| <b>41g</b> | 4.45  | 13.0   | -7.9   | -17.8  | 31.2   | -161.2 | -80.9  | 179.2  |
| <b>42g</b> | 4.48  | 75.3   | 157.3  | -27.6  | 25.8   | -55.7  | 171.2  | -76.4  |
| <b>43g</b> | 4.49  | 13.3   | -8.2   | -17.2  | 29.4   | -160.8 | -79.5  | 178.9  |
| <b>44g</b> | 4.54  | 11.3   | -7.3   | -16.3  | 30.7   | -160.0 | -153.2 | -178.7 |
| <b>45g</b> | 4.70  | -1.1   | 2.5    | 161.3  | -95.8  | -52.4  | 179.6  | 72.0   |
| <b>46g</b> | 4.72  | -1.3   | 2.4    | 161.4  | -94.8  | -52.0  | 177.8  | 71.8   |
| <b>47g</b> | 4.85  | 17.5   | -13.9  | -38.7  | 35.8   | -56.5  | 174.1  | 64.7   |
| <b>48g</b> | 4.85  | 79.2   | -125.0 | -177.5 | -48.4  | -173.9 | 82.9   | -72.1  |
| <b>49g</b> | 5.18  | 67.8   | 163.0  | -17.9  | 26.3   | -166.7 | -81.2  | 174.6  |
| <b>50g</b> | 5.37  | -52.6  | 150.1  | 151.7  | 50.9   | 63.3   | 34.0   | -45.0  |
| <b>51g</b> | 5.50  | 84.9   | -163.5 | -129.4 | -72.3  | -50.4  | 166.8  | 67.2   |
| <b>52g</b> | 5.64  | 65.5   | 166.3  | -14.8  | 24.6   | -159.6 | -140.0 | 179.8  |
| <b>53g</b> | 6.21  | -74.7  | 95.2   | 146.6  | 98.3   | 41.3   | -167.3 | 67.1   |
| <b>54g</b> | 6.44  | -79.3  | 102.9  | -156.8 | 165.1  | 42.3   | 162.2  | -72.7  |
| <b>55g</b> | 6.64  | 68.5   | 96.2   | 137.9  | -161.3 | 41.4   | 80.3   | -72.4  |
| <b>56g</b> | 6.65  | -63.8  | -141.6 | -152.3 | 65.0   | 179.2  | 78.8   | -94.1  |
| <b>57g</b> | 6.71  | 84.4   | -153.4 | -141.8 | -65.7  | -171.4 | 60.7   | 68.7   |
| <b>58g</b> | 6.86  | -178.2 | 157.8  | 144.5  | 54.8   | -50.4  | 163.6  | 71.8   |
| <b>59g</b> | 6.96  | -1.2   | 1.9    | 164.5  | 65.3   | -51.8  | 164.6  | 69.0   |
| <b>60g</b> | 7.26  | 177.2  | -166.0 | -12.1  | -71.6  | -48.8  | 169.5  | 70.4   |
| <b>61g</b> | 7.47  | 86.3   | -154.9 | 139.0  | -69.6  | -47.8  | 169.7  | 69.6   |
| <b>62g</b> | 7.51  | -69.9  | -111.8 | -10.2  | 18.5   | -158.8 | -78.9  | 174.7  |
| <b>63g</b> | 7.71  | 69.4   | -149.1 | -52.8  | 170.1  | -52.0  | -100.6 | 179.2  |
| <b>64g</b> | 8.45  | -62.0  | -163.8 | -129.8 | 78.4   | -165.2 | -157.7 | -172.0 |
| <b>65g</b> | 11.05 | 57.2   | 121.5  | -139.3 | 79.5   | -160.5 | -84.3  | -175.4 |

**Table S2.** Optimized conformations for DFX in implicit water at the  $\omega$ B97X-D/6-311++g(d,p) level and respective free energies (kcal mol<sup>-1</sup>) and key dihedral angles.

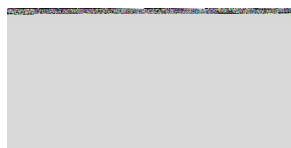

| Conf.      | $\Delta G_{\text{rel}}^0$ | HOC(H <sub>2</sub> )C(=O) | OCC=O  | O=CCO(H) | C(=O)COH | (H)OCCO(H) | HOCC(F) | OCCF   |
|------------|---------------------------|---------------------------|--------|----------|----------|------------|---------|--------|
| <b>1w</b>  | 0.00                      | -18.9                     | 10.7   | 7.2      | -10.5    | 64.1       | 67.6    | 63.2   |
| <b>2w</b>  | 0.66                      | -19.1                     | 11.0   | 5.8      | -8.2     | 59.7       | 72.9    | 174.9  |
| <b>3w</b>  | 0.66                      | 2.0                       | -0.7   | 176.9    | 84.5     | 54.4       | -53.2   | 59.8   |
| <b>4w</b>  | 0.86                      | 6.9                       | -3.2   | -7.0     | -165.7   | 176.9      | -59.2   | 65.7   |
| <b>5w</b>  | 0.87                      | -18.3                     | 9.7    | 0.9      | 4.5      | 71.1       | -59.2   | 62.3   |
| <b>6w</b>  | 1.22                      | -0.8                      | 0.6    | -176.3   | -170.5   | 50.3       | 78.6    | -69.1  |
| <b>7w</b>  | 1.32                      | 2.1                       | -1.0   | -176.6   | -125.7   | 75.7       | -48.9   | 60.6   |
| <b>8w</b>  | 1.40                      | -16.8                     | 9.4    | -0.5     | 7.6      | 68.1       | -74.0   | 177.4  |
| <b>9w</b>  | 1.47                      | 1.2                       | -0.3   | 179.0    | 83.5     | 53.5       | -71.0   | 178.3  |
| <b>10w</b> | 1.59                      | 6.4                       | -3.7   | -2.0     | 2.6      | -170.3     | -161.0  | -62.6  |
| <b>11w</b> | 1.71                      | 68.2                      | 159.7  | -11.4    | 10.5     | -168.6     | -57.7   | 64.8   |
| <b>12w</b> | 1.74                      | -80.6                     | 159.0  | -7.0     | 13.9     | 70.1       | -60.2   | 62.3   |
| <b>13w</b> | 1.74                      | 0.5                       | 1.0    | -177.9   | -102.8   | -75.8      | 83.2    | -66.1  |
| <b>14w</b> | 1.82                      | 2.0                       | -0.7   | 176.8    | 84.5     | 54.4       | -53.2   | 59.8   |
| <b>15w</b> | 1.92                      | -1.1                      | 1.6    | 165.8    | 156.6    | -45.2      | 47.1    | -59.3  |
| <b>16w</b> | 1.96                      | 68.8                      | 153.4  | -5.6     | 6.9      | 169.9      | -66.6   | -59.1  |
| <b>17w</b> | 1.98                      | -1.2                      | 1.8    | 165.8    | 157.9    | -42.3      | -79.8   | 64.8   |
| <b>18w</b> | 2.08                      | 2.3                       | -0.4   | 171.8    | -90.5    | 66.2       | -62.2   | 63.6   |
| <b>19w</b> | 2.39                      | -89.7                     | 178.2  | -6.1     | 5.0      | -156.0     | -43.0   | -63.0  |
| <b>20w</b> | 2.46                      | 19.4                      | -11.8  | -35.7    | 39.4     | -55.2      | 172.7   | -71.9  |
| <b>21w</b> | 2.57                      | 3.4                       | -2.6   | -16.7    | -12.5    | -170.4     | 70.9    | 67.1   |
| <b>22w</b> | 2.61                      | 0.6                       | 0.8    | 173.7    | -95.7    | 62.8       | -79.0   | 178.3  |
| <b>23w</b> | 2.61                      | 0.6                       | 0.8    | 173.7    | -95.7    | 84.1       | -79.0   | 178.3  |
| <b>24w</b> | 2.63                      | -56.4                     | 158.4  | 148.3    | 49.8     | 70.5       | -60.6   | 61.3   |
| <b>25w</b> | 2.65                      | 1.2                       | -0.9   | -178.1   | 96.1     | 40.7       | -147.3  | -63.0  |
| <b>26w</b> | 2.85                      | -12.9                     | 7.3    | -109.0   | 79.4     | 72.4       | -166.4  | 178.2  |
| <b>27w</b> | 2.93                      | -2.2                      | 2.5    | 166.8    | -94.3    | -50.6      | 171.5   | 67.3   |
| <b>28w</b> | 3.26                      | 11.0                      | -8.8   | -34.2    | 34.0     | -48.5      | 168.4   | 65.2   |
| <b>29w</b> | 3.30                      | 17.9                      | -11.9  | -37.5    | 39.2     | -55.8      | 171.0   | 166.3  |
| <b>30w</b> | 3.32                      | -56.4                     | 159.3  | 147.8    | 49.2     | 68.6       | -75.5   | 176.5  |
| <b>31w</b> | 3.33                      | 4.1                       | -2.7   | -169.6   | 82.3     | -164.7     | 74.7    | -179.3 |
| <b>32w</b> | 3.48                      | 75.7                      | -143.6 | -1.0     | -0.5     | -156.4     | 76.7    | -67.2  |
| <b>33w</b> | 3.66                      | 62.5                      | 146.1  | 151.8    | 161.6    | -47.7      | 47.9    | -59.1  |
| <b>34w</b> | 3.67                      | -55.2                     | -174.9 | -123.3   | 77.9     | 52.0       | -161.3  | 179.5  |
| <b>35w</b> | 3.68                      | 12.1                      | -6.6   | -16.6    | 32.6     | -161.9     | -157.6  | -177.2 |
| <b>36w</b> | 3.71                      | 13.5                      | -7.1   | -17.7    | 32.9     | -162.0     | -77.9   | -178.8 |
| <b>37w</b> | 3.72                      | 13.9                      | -7.2   | -17.7    | 32.7     | -162.1     | -78.1   | -178.8 |

|            |      |        |        |        |        |        |        |        |
|------------|------|--------|--------|--------|--------|--------|--------|--------|
| <b>38w</b> | 3.74 | -64.0  | -136.9 | 159.5  | -170.1 | 49.2   | 80.4   | -70.7  |
| <b>39w</b> | 4.11 | -79.6  | 108.5  | 141.2  | 98.1   | 39.9   | -172.0 | 63.7   |
| <b>40w</b> | 4.19 | -61.1  | -156.3 | -137.5 | 164.3  | -46.1  | -79.1  | 64.3   |
| <b>41w</b> | 4.31 | 67.6   | 161.6  | -16.5  | 26.1   | -166.2 | -81.3  | 178.1  |
| <b>42w</b> | 4.33 | 62.5   | 143.7  | 154.2  | 163.5  | -50.7  | -79.6  | 64.1   |
| <b>43w</b> | 4.43 | 65.7   | 163.9  | -16.1  | 28.2   | -164.2 | -124.6 | -178.4 |
| <b>44w</b> | 4.52 | 87.8   | -178.6 | -29.8  | 30.7   | -49.2  | 167.0  | 171.5  |
| <b>45w</b> | 4.62 | 87.6   | -16.7  | -128.9 | -69.4  | -49.0  | 168.9  | -75.4  |
| <b>46w</b> | 4.70 | 172.7  | 161.3  | 142.4  | 52.9   | -50.7  | 160.8  | 66.5   |
| <b>47w</b> | 4.80 | -72.8  | -104.9 | -3.7   | 2.6    | -167.8 | -69.5  | 65.7   |
| <b>48w</b> | 4.80 | -1.9   | 2.3    | 167.0  | -93.6  | -50.0  | 169.8  | 67.2   |
| <b>49w</b> | 4.83 | -174.4 | -171.4 | -124.3 | -69.4  | 165.7  | 165.7  | 68.2   |
| <b>50w</b> | 4.85 | 76.7   | 159.2  | -28.2  | 32.4   | -55.5  | 174.3  | -73.0  |
| <b>51w</b> | 4.86 | -59.6  | -157.4 | -136.8 | 163.7  | -43.9  | 45.1   | -58.2  |
| <b>52w</b> | 4.91 | -56.1  | 155.6  | 148.8  | 50.9   | 60.6   | 37.4   | -50.7  |
| <b>53w</b> | 4.92 | 79.2   | -16.3  | -171.5 | -47.2  | 174.6  | 83.9   | -69.7  |
| <b>54w</b> | 5.02 | -72.0  | 142.2  | 168.5  | 39.5   | -168.7 | 87.3   | -67.8  |
| <b>55w</b> | 5.11 | 87.9   | -170.5 | -27.6  | -69.7  | -47.5  | 165.6  | 67.8   |
| <b>56w</b> | 5.15 | 82.9   | -156.7 | -144.8 | -59.3  | -71.1  | 66.7   | 66.9   |
| <b>57w</b> | 5.15 | -0.2   | 0.5    | 178.0  | 67.6   | -51.2  | 168.2  | 63.3   |
| <b>58w</b> | 5.17 | -173.4 | -156.0 | -144.5 | -55.9  | 45.4   | 82.6   | -63.8  |
| <b>59w</b> | 5.26 | 64.4   | 126.2  | -178.5 | -16.9  | 51.8   | 75.3   | -69.1  |
| <b>60w</b> | 6.06 | -83.7  | 114.8  | 143.0  | 108.0  | 35.3   | -172.6 | -66.0  |
| <b>61w</b> | 6.48 | -71.6  | -101.9 | -12.1  | 20.4   | -164.3 | -78.8  | 176.2  |
| <b>62w</b> | 6.76 | 76.9   | -160.6 | -43.9  | 166.2  | -53.8  | -91.6  | 179.5  |
| <b>63w</b> | 7.09 | -63.7  | -133.2 | -165.5 | 72.0   | -173.9 | 80.9   | -74.8  |
| <b>64w</b> | 8.18 | -60.7  | -154.5 | -142.4 | 75.8   | -162.3 | -150.8 | -169.5 |
| <b>65w</b> | 9.61 | 69.6   | 110.7  | -148.4 | 87.2   | -161.3 | -94.9  | -175.9 |

Standard coordinates and absolute energies, in hartrees ( $\omega$ B97X-D/6-311++g\*\*)

1g

| Center Number | Atomic Number | Atomic Type | Coordinates (Angstroms) |           |           |
|---------------|---------------|-------------|-------------------------|-----------|-----------|
|               |               |             | X                       | Y         | Z         |
| 1             | 6             | 0           | -1.882146               | 1.087791  | -0.018167 |
| 2             | 1             | 0           | -1.521562               | 1.413005  | -1.007003 |
| 3             | 1             | 0           | -1.504638               | 1.807620  | 0.717396  |
| 4             | 8             | 0           | -3.274323               | 1.051422  | 0.029257  |
| 5             | 1             | 0           | -3.539683               | 0.127914  | -0.049126 |
| 6             | 6             | 0           | -1.269641               | -0.267201 | 0.236248  |
| 7             | 8             | 0           | -1.959140               | -1.262561 | 0.231549  |
| 8             | 6             | 0           | 0.2220091               | -0.388747 | 0.513373  |
| 9             | 1             | 0           | 0.401377                | 0.072154  | 1.495982  |
| 10            | 6             | 0           | 1.071640                | 0.340593  | -0.531037 |
| 11            | 1             | 0           | 0.747200                | 1.381938  | -0.609055 |
| 12            | 6             | 0           | 2.546733                | 0.334674  | -0.146837 |
| 13            | 1             | 0           | 2.907581                | -0.683698 | 0.016191  |
| 14            | 1             | 0           | 3.132073                | 0.821855  | -0.928559 |
| 15            | 9             | 0           | 2.713018                | 1.047906  | 1.036582  |
| 16            | 8             | 0           | 0.594600                | -1.741059 | 0.518621  |
| 17            | 1             | 0           | -0.221833               | -2.256652 | 0.557597  |
| 18            | 8             | 0           | 0.899287                | -0.243029 | -1.799347 |
| 19            | 1             | 0           | 0.978862                | -1.196136 | -1.684773 |

HF=-596.6735887

2g

| Center Number | Atomic Number | Atomic Type | Coordinates (Angstroms) |           |           |
|---------------|---------------|-------------|-------------------------|-----------|-----------|
|               |               |             | X                       | Y         | Z         |
| 1             | 6             | 0           | -1.779554               | -0.955770 | -0.416050 |
| 2             | 1             | 0           | -0.989489               | -1.713244 | -0.416634 |
| 3             | 1             | 0           | -2.103336               | -0.849418 | -1.462679 |
| 4             | 8             | 0           | -2.837419               | -1.337743 | 0.409240  |
| 5             | 1             | 0           | -3.049859               | -0.584772 | 0.972419  |
| 6             | 6             | 0           | -1.190099               | 0.367518  | -0.004026 |
| 7             | 8             | 0           | -1.693817               | 1.010811  | 0.892688  |
| 8             | 6             | 0           | 0.018919                | 0.941211  | -0.738291 |
| 9             | 1             | 0           | -0.206992               | 0.927067  | -1.812678 |
| 10            | 6             | 0           | 1.296808                | 0.103043  | -0.553649 |
| 11            | 1             | 0           | 2.111247                | 0.700447  | -0.980896 |
| 12            | 6             | 0           | 1.612911                | -0.156843 | 0.905678  |
| 13            | 1             | 0           | 1.724033                | 0.778998  | 1.455383  |
| 14            | 1             | 0           | 0.857078                | -0.791895 | 1.377470  |
| 15            | 9             | 0           | 2.824196                | -0.847591 | 0.966811  |
| 16            | 8             | 0           | 0.265181                | 2.248187  | -0.308737 |
| 17            | 1             | 0           | -0.384169               | 2.445566  | 0.378940  |
| 18            | 8             | 0           | 1.134329                | -1.101902 | -1.271199 |
| 19            | 1             | 0           | 1.923627                | -1.634211 | -1.150532 |

HF=-596.6715832

### 3g

| Center<br>Number | Atomic<br>Number | Atomic<br>Type | Coordinates (Angstroms) |           |           |
|------------------|------------------|----------------|-------------------------|-----------|-----------|
|                  |                  |                | X                       | Y         | Z         |
| 1                | 6                | 0              | -2.385444               | 0.513529  | 0.293801  |
| 2                | 1                | 0              | -2.589655               | 1.409777  | -0.304154 |
| 3                | 1                | 0              | -1.969314               | 0.862051  | 1.251001  |
| 4                | 8                | 0              | -3.544967               | -0.233990 | 0.490717  |
| 5                | 1                | 0              | -3.355469               | -1.130388 | 0.187206  |
| 6                | 6                | 0              | -1.311568               | -0.292262 | -0.392813 |
| 7                | 8                | 0              | -1.496887               | -1.452238 | -0.676694 |
| 8                | 6                | 0              | 0.022513                | 0.382526  | -0.718474 |
| 9                | 1                | 0              | 0.159899                | 0.271263  | -1.798926 |
| 10               | 6                | 0              | 1.152448                | -0.350003 | 0.009852  |
| 11               | 1                | 0              | 1.008718                | -1.429361 | -0.112502 |
| 12               | 6                | 0              | 2.511518                | 0.047477  | -0.531060 |
| 13               | 1                | 0              | 2.650010                | -0.316645 | -1.551676 |
| 14               | 1                | 0              | 2.660460                | 1.128078  | -0.487529 |
| 15               | 9                | 0              | 3.486605                | -0.545609 | 0.273405  |
| 16               | 8                | 0              | 0.033969                | 1.757123  | -0.431295 |
| 17               | 1                | 0              | 0.244251                | 1.850086  | 0.504231  |
| 18               | 8                | 0              | 1.019706                | 0.023968  | 1.370565  |
| 19               | 1                | 0              | 1.780284                | -0.300878 | 1.857524  |

HF=-596.6719263

### 4g

| Center<br>Number | Atomic<br>Number | Atomic<br>Type | Coordinates (Angstroms) |           |           |
|------------------|------------------|----------------|-------------------------|-----------|-----------|
|                  |                  |                | X                       | Y         | Z         |
| 1                | 6                | 0              | 1.929667                | -0.780728 | -0.690885 |
| 2                | 1                | 0              | 2.942499                | -0.543079 | -1.022017 |
| 3                | 1                | 0              | 1.395578                | -1.198262 | -1.558390 |
| 4                | 8                | 0              | 2.015360                | -1.686903 | 0.369588  |
| 5                | 1                | 0              | 1.123175                | -2.004679 | 0.555231  |
| 6                | 6                | 0              | 1.251536                | 0.536754  | -0.359147 |
| 7                | 8                | 0              | 1.432028                | 1.524793  | -1.033764 |
| 8                | 6                | 0              | 0.302588                | 0.633656  | 0.840021  |
| 9                | 1                | 0              | 0.804241                | 0.191120  | 1.707658  |
| 10               | 6                | 0              | -1.010502               | -0.143749 | 0.617860  |
| 11               | 1                | 0              | -1.645532               | 0.072517  | 1.484494  |
| 12               | 6                | 0              | -1.742991               | 0.295330  | -0.633587 |
| 13               | 1                | 0              | -1.989278               | 1.356646  | -0.592592 |
| 14               | 1                | 0              | -1.173048               | 0.070123  | -1.539647 |
| 15               | 9                | 0              | -2.933160               | -0.432392 | -0.706134 |
| 16               | 8                | 0              | -0.012619               | 1.972514  | 1.089253  |
| 17               | 1                | 0              | 0.378740                | 2.485522  | 0.368604  |
| 18               | 8                | 0              | -0.720414               | -1.532364 | 0.564360  |
| 19               | 1                | 0              | -1.534561               | -2.010277 | 0.390792  |

HF=-596.6734943

## 5g

| Center<br>Number | Atomic<br>Number | Atomic<br>Type | Coordinates (Angstroms) |           |           |
|------------------|------------------|----------------|-------------------------|-----------|-----------|
|                  |                  |                | X                       | Y         | Z         |
| 1                | 6                | 0              | 2.461729                | 0.319469  | -0.333227 |
| 2                | 1                | 0              | 2.813735                | 1.140945  | 0.303965  |
| 3                | 1                | 0              | 2.192435                | 0.775796  | -1.294706 |
| 4                | 8                | 0              | 3.440930                | -0.659909 | -0.492700 |
| 5                | 1                | 0              | 3.077283                | -1.482318 | -0.142571 |
| 6                | 6                | 0              | 1.207783                | -0.245367 | 0.284547  |
| 7                | 8                | 0              | 1.146988                | -1.416609 | 0.586258  |
| 8                | 6                | 0              | 0.030550                | 0.684511  | 0.524971  |
| 9                | 1                | 0              | -0.201381               | 0.633197  | 1.599888  |
| 10               | 6                | 0              | -1.215426               | 0.236645  | -0.257279 |
| 11               | 1                | 0              | -0.952783               | 0.111062  | -1.317164 |
| 12               | 6                | 0              | -1.828178               | -1.048733 | 0.263777  |
| 13               | 1                | 0              | -1.174031               | -1.906101 | 0.115031  |
| 14               | 1                | 0              | -2.097601               | -0.952497 | 1.318418  |
| 15               | 9                | 0              | -3.009952               | -1.263490 | -0.453074 |
| 16               | 8                | 0              | 0.395950                | 1.988329  | 0.156864  |
| 17               | 1                | 0              | -0.416263               | 2.498398  | 0.077519  |
| 18               | 8                | 0              | -2.127248               | 1.311823  | -0.114700 |
| 19               | 1                | 0              | -2.943539               | 1.084705  | -0.565223 |

HF=-596.6710102

## 6g

| Center<br>Number | Atomic<br>Number | Atomic<br>Type | Coordinates (Angstroms) |           |           |
|------------------|------------------|----------------|-------------------------|-----------|-----------|
|                  |                  |                | X                       | Y         | Z         |
| 1                | 6                | 0              | -1.935175               | -1.011537 | -0.450986 |
| 2                | 1                | 0              | -1.352214               | -1.762288 | 0.102933  |
| 3                | 1                | 0              | -1.777727               | -1.194448 | -1.520423 |
| 4                | 8                | 0              | -3.295000               | -1.100592 | -0.155655 |
| 5                | 1                | 0              | -3.501794               | -0.382530 | 0.453562  |
| 6                | 6                | 0              | -1.362287               | 0.335202  | -0.080497 |
| 7                | 8                | 0              | -2.003026               | 1.115619  | 0.583651  |
| 8                | 6                | 0              | 0.037497                | 0.719400  | -0.548664 |
| 9                | 1                | 0              | 0.006198                | 0.752459  | -1.648797 |
| 10               | 6                | 0              | 1.052782                | -0.354983 | -0.146297 |
| 11               | 1                | 0              | 0.869974                | -1.250171 | -0.761167 |
| 12               | 6                | 0              | 2.467211                | 0.120159  | -0.410071 |
| 13               | 1                | 0              | 2.629792                | 0.322872  | -1.471353 |
| 14               | 1                | 0              | 2.699230                | 1.000781  | 0.188594  |
| 15               | 9                | 0              | 3.339756                | -0.903688 | -0.028826 |
| 16               | 8                | 0              | 0.385865                | 1.978343  | -0.059941 |
| 17               | 1                | 0              | -0.327624               | 2.259607  | 0.527648  |
| 18               | 8                | 0              | 0.855168                | -0.652915 | 1.217430  |
| 19               | 1                | 0              | 1.592127                | -1.186177 | 1.523646  |

HF=-596.6712281



## 7g

| Center<br>Number | Atomic<br>Number | Atomic<br>Type | Coordinates (Angstroms) |           |           |
|------------------|------------------|----------------|-------------------------|-----------|-----------|
|                  |                  |                | X                       | Y         | Z         |
| 1                | 6                | 0              | -2.241987               | 0.713274  | 0.205366  |
| 2                | 1                | 0              | -2.240468               | 1.631595  | -0.393732 |
| 3                | 1                | 0              | -1.860248               | 0.989912  | 1.198292  |
| 4                | 8                | 0              | -3.522468               | 0.167562  | 0.283693  |
| 5                | 1                | 0              | -3.455772               | -0.748958 | -0.010984 |
| 6                | 6                | 0              | -1.260756               | -0.259938 | -0.397020 |
| 7                | 8                | 0              | -1.609775               | -1.372634 | -0.714553 |
| 8                | 6                | 0              | 0.187023                | 0.168204  | -0.593945 |
| 9                | 1                | 0              | 0.400739                | 0.043755  | -1.663752 |
| 10               | 6                | 0              | 1.114596                | -0.752361 | 0.223264  |
| 11               | 1                | 0              | 0.790433                | -1.785430 | 0.063415  |
| 12               | 6                | 0              | 2.556647                | -0.668804 | -0.240860 |
| 13               | 1                | 0              | 3.211997                | -1.187702 | 0.459717  |
| 14               | 1                | 0              | 2.670614                | -1.080955 | -1.246937 |
| 15               | 9                | 0              | 2.981579                | 0.670650  | -0.295515 |
| 16               | 8                | 0              | 0.322665                | 1.515695  | -0.193035 |
| 17               | 1                | 0              | 1.208889                | 1.811076  | -0.418667 |
| 18               | 8                | 0              | 0.976424                | -0.483563 | 1.596640  |
| 19               | 1                | 0              | 0.971705                | 0.472126  | 1.709507  |

HF=-596.6711414

## 8g

| Center<br>Number | Atomic<br>Number | Atomic<br>Type | Coordinates (Angstroms) |           |           |
|------------------|------------------|----------------|-------------------------|-----------|-----------|
|                  |                  |                | X                       | Y         | Z         |
| 1                | 6                | 0              | 2.405457                | 0.462381  | -0.112253 |
| 2                | 1                | 0              | 2.641130                | 1.143830  | 0.715126  |
| 3                | 1                | 0              | 2.192542                | 1.101566  | -0.979177 |
| 4                | 8                | 0              | 3.460836                | -0.410059 | -0.375322 |
| 5                | 1                | 0              | 3.131685                | -1.303870 | -0.219742 |
| 6                | 6                | 0              | 1.143745                | -0.285847 | 0.241529  |
| 7                | 8                | 0              | 1.146950                | -1.496264 | 0.295257  |
| 8                | 6                | 0              | -0.122596               | 0.509816  | 0.500153  |
| 9                | 1                | 0              | -0.533021               | 0.170171  | 1.461520  |
| 10               | 6                | 0              | -1.172834               | 0.240551  | -0.608908 |
| 11               | 1                | 0              | -0.688367               | 0.330492  | -1.586557 |
| 12               | 6                | 0              | -1.821338               | -1.125269 | -0.510085 |
| 13               | 1                | 0              | -2.482491               | -1.295898 | -1.361893 |
| 14               | 1                | 0              | -1.079610               | -1.918831 | -0.423203 |
| 15               | 9                | 0              | -2.619143               | -1.144426 | 0.640217  |
| 16               | 8                | 0              | 0.191672                | 1.877339  | 0.540123  |
| 17               | 1                | 0              | -0.607839               | 2.352688  | 0.288399  |
| 18               | 8                | 0              | -2.148497               | 1.265073  | -0.562288 |
| 19               | 1                | 0              | -2.804031               | 1.021170  | 0.098801  |

HF=-596.6709873

## 9g

| Center<br>Number | Atomic<br>Number | Atomic<br>Type | Coordinates (Angstroms) |           |           |
|------------------|------------------|----------------|-------------------------|-----------|-----------|
|                  |                  |                | X                       | Y         | Z         |
| 1                | 6                | 0              | -1.894746               | -1.098120 | -0.306503 |
| 2                | 1                | 0              | -1.356523               | -1.717277 | 0.427965  |
| 3                | 1                | 0              | -1.628977               | -1.469289 | -1.303285 |
| 4                | 8                | 0              | -3.275324               | -1.175569 | -0.131878 |
| 5                | 1                | 0              | -3.550622               | -0.378410 | 0.334881  |
| 6                | 6                | 0              | -1.378134               | 0.307697  | -0.132409 |
| 7                | 8                | 0              | -2.085036               | 1.170225  | 0.337780  |
| 8                | 6                | 0              | 0.043134                | 0.656061  | -0.554600 |
| 9                | 1                | 0              | 0.058766                | 0.618328  | -1.656409 |
| 10               | 6                | 0              | 1.063812                | -0.346120 | -0.003472 |
| 11               | 1                | 0              | 0.845151                | -1.342446 | -0.399655 |
| 12               | 6                | 0              | 2.466228                | 0.033728  | -0.452437 |
| 13               | 1                | 0              | 2.497308                | 0.174129  | -1.537404 |
| 14               | 1                | 0              | 2.800651                | 0.949751  | 0.040351  |
| 15               | 9                | 0              | 3.351083                | -0.981029 | -0.128969 |
| 16               | 8                | 0              | 0.376103                | 1.939364  | -0.100287 |
| 17               | 1                | 0              | -0.447684               | 2.361633  | 0.177432  |
| 18               | 8                | 0              | 0.949527                | -0.448085 | 1.395079  |
| 19               | 1                | 0              | 1.098256                | 0.425899  | 1.767821  |

HF=-596.6710288

## 10g

|    |   |   |           |           |           |
|----|---|---|-----------|-----------|-----------|
| 1  | 6 | 0 | -2.401037 | 0.656597  | 0.011991  |
| 2  | 1 | 0 | -2.362675 | 1.555738  | -0.617327 |
| 3  | 1 | 0 | -2.305549 | 1.007153  | 1.048148  |
| 4  | 8 | 0 | -3.593188 | -0.041702 | -0.172841 |
| 5  | 1 | 0 | -3.354990 | -0.933865 | -0.453613 |
| 6  | 6 | 0 | -1.197189 | -0.198583 | -0.304771 |
| 7  | 8 | 0 | -1.341556 | -1.359525 | -0.617652 |
| 8  | 6 | 0 | 0.184400  | 0.451152  | -0.243845 |
| 9  | 1 | 0 | 0.418261  | 0.769395  | -1.266424 |
| 10 | 6 | 0 | 1.242176  | -0.554450 | 0.215477  |
| 11 | 1 | 0 | 1.126785  | -1.477548 | -0.357960 |
| 12 | 6 | 0 | 2.653882  | -0.021170 | 0.036148  |
| 13 | 1 | 0 | 2.787578  | 0.925882  | 0.563404  |
| 14 | 1 | 0 | 3.379157  | -0.754271 | 0.393096  |
| 15 | 9 | 0 | 2.882534  | 0.201149  | -1.316101 |
| 16 | 8 | 0 | 0.187495  | 1.605695  | 0.559765  |
| 17 | 1 | 0 | 0.288234  | 1.312805  | 1.472108  |
| 18 | 8 | 0 | 1.079969  | -0.786877 | 1.610143  |
| 19 | 1 | 0 | 0.525241  | -1.557636 | 1.738153  |

HF=-596.6697347

## 11g

| Center<br>Number | Atomic<br>Number | Atomic<br>Type | Coordinates (Angstroms) |           |           |
|------------------|------------------|----------------|-------------------------|-----------|-----------|
|                  |                  |                | X                       | Y         | Z         |
| 1                | 6                | 0              | -2.405934               | 0.681635  | 0.118894  |
| 2                | 1                | 0              | -2.333362               | 1.672577  | -0.349085 |
| 3                | 1                | 0              | -2.339216               | 0.850096  | 1.201394  |
| 4                | 8                | 0              | -3.601160               | 0.048949  | -0.219479 |
| 5                | 1                | 0              | -3.367642               | -0.792804 | -0.629541 |
| 6                | 6                | 0              | -1.202938               | -0.129371 | -0.302012 |
| 7                | 8                | 0              | -1.351216               | -1.222279 | -0.802667 |
| 8                | 6                | 0              | 0.180832                | 0.487863  | -0.099339 |
| 9                | 1                | 0              | 0.387409                | 1.090360  | -0.991646 |
| 10               | 6                | 0              | 1.252952                | -0.594805 | 0.026299  |
| 11               | 1                | 0              | 1.143537                | -1.300525 | -0.801283 |
| 12               | 6                | 0              | 2.656876                | -0.013796 | 0.007644  |
| 13               | 1                | 0              | 2.788967                | 0.724705  | 0.801337  |
| 14               | 1                | 0              | 3.394421                | -0.811259 | 0.111450  |
| 15               | 9                | 0              | 2.864028                | 0.620787  | -1.211320 |
| 16               | 8                | 0              | 0.196656                | 1.365797  | 1.001090  |
| 17               | 1                | 0              | 0.302899                | 0.824490  | 1.790970  |
| 18               | 8                | 0              | 1.110374                | -1.247415 | 1.281570  |
| 19               | 1                | 0              | 0.518776                | -1.994304 | 1.175253  |

HF=-596.6698093

## 12g

| Center<br>Number | Atomic<br>Number | Atomic<br>Type | Coordinates (Angstroms) |           |           |
|------------------|------------------|----------------|-------------------------|-----------|-----------|
|                  |                  |                | X                       | Y         | Z         |
| 1                | 6                | 0              | -2.388636               | -0.417306 | -0.271986 |
| 2                | 1                | 0              | -2.865558               | -0.333658 | -1.253976 |
| 3                | 1                | 0              | -3.171465               | -0.336793 | 0.487791  |
| 4                | 8                | 0              | -1.757298               | -1.665607 | -0.086573 |
| 5                | 1                | 0              | -1.008355               | -1.712584 | -0.695484 |
| 6                | 6                | 0              | -1.467429               | 0.789646  | -0.112390 |
| 7                | 8                | 0              | -1.737740               | 1.844486  | -0.626566 |
| 8                | 6                | 0              | -0.174706               | 0.636184  | 0.707095  |
| 9                | 1                | 0              | 0.004760                | 1.612309  | 1.165443  |
| 10               | 6                | 0              | 0.985186                | 0.369397  | -0.261576 |
| 11               | 1                | 0              | 1.068315                | 1.235716  | -0.930039 |
| 12               | 6                | 0              | 2.289735                | 0.179792  | 0.481695  |
| 13               | 1                | 0              | 2.572265                | 1.087208  | 1.019946  |
| 14               | 1                | 0              | 2.235643                | -0.667020 | 1.166262  |
| 15               | 9                | 0              | 3.286226                | -0.093426 | -0.460951 |
| 16               | 8                | 0              | -0.266467               | -0.295483 | 1.752946  |
| 17               | 1                | 0              | -0.660837               | -1.105350 | 1.399766  |
| 18               | 8                | 0              | 0.679057                | -0.791970 | -1.027963 |
| 19               | 1                | 0              | 1.443876                | -1.016681 | -1.562927 |

HF=-596.6727848

### 13g

| Center<br>Number | Atomic<br>Number | Atomic<br>Type | Coordinates (Angstroms) |           |           |
|------------------|------------------|----------------|-------------------------|-----------|-----------|
|                  |                  |                | X                       | Y         | Z         |
| 1                | 6                | 0              | -2.303238               | -0.555628 | 0.238505  |
| 2                | 1                | 0              | -2.353734               | -0.983582 | 1.246627  |
| 3                | 1                | 0              | -2.029775               | -1.379765 | -0.436128 |
| 4                | 8                | 0              | -3.522355               | 0.016321  | -0.119849 |
| 5                | 1                | 0              | -3.335371               | 0.921096  | -0.399714 |
| 6                | 6                | 0              | -1.183202               | 0.454116  | 0.189508  |
| 7                | 8                | 0              | -1.393952               | 1.590503  | -0.161971 |
| 8                | 6                | 0              | 0.226510                | 0.018907  | 0.567239  |
| 9                | 1                | 0              | 0.568386                | 0.694434  | 1.357422  |
| 10               | 6                | 0              | 1.152660                | 0.162516  | -0.646918 |
| 11               | 1                | 0              | 1.016856                | 1.161671  | -1.065241 |
| 12               | 6                | 0              | 2.614793                | -0.050044 | -0.274597 |
| 13               | 1                | 0              | 2.783224                | -1.075881 | 0.068102  |
| 14               | 1                | 0              | 3.254900                | 0.156053  | -1.133699 |
| 15               | 9                | 0              | 2.975064                | 0.809553  | 0.759952  |
| 16               | 8                | 0              | 0.221711                | -1.335251 | 0.996823  |
| 17               | 1                | 0              | 0.726363                | -1.421995 | 1.804807  |
| 18               | 8                | 0              | 0.797558                | -0.760443 | -1.650976 |
| 19               | 1                | 0              | 0.724733                | -1.626248 | -1.236381 |

HF=-596.6683796

### 14g

| Center<br>Number | Atomic<br>Number | Atomic<br>Type | Coordinates (Angstroms) |           |           |
|------------------|------------------|----------------|-------------------------|-----------|-----------|
|                  |                  |                | X                       | Y         | Z         |
| 1                | 6                | 0              | -2.103847               | -0.571152 | 0.084990  |
| 2                | 1                | 0              | -2.413188               | -0.879626 | 1.091561  |
| 3                | 1                | 0              | -1.729632               | -1.478442 | -0.410945 |
| 4                | 8                | 0              | -3.164128               | -0.010925 | -0.623746 |
| 5                | 1                | 0              | -2.884930               | 0.867744  | -0.907997 |
| 6                | 6                | 0              | -0.946976               | 0.383309  | 0.216938  |
| 7                | 8                | 0              | -0.994338               | 1.476453  | -0.314170 |
| 8                | 6                | 0              | 0.271240                | -0.034392 | 1.031083  |
| 9                | 1                | 0              | 0.222603                | 0.555444  | 1.953583  |
| 10               | 6                | 0              | 1.590142                | 0.370423  | 0.333963  |
| 11               | 1                | 0              | 2.397030                | -0.033843 | 0.950372  |
| 12               | 6                | 0              | 1.722418                | -0.180265 | -1.084190 |
| 13               | 1                | 0              | 0.995668                | 0.276914  | -1.760233 |
| 14               | 1                | 0              | 2.731276                | -0.018204 | -1.463784 |
| 15               | 9                | 0              | 1.477217                | -1.564941 | -1.085628 |
| 16               | 8                | 0              | 0.234661                | -1.384461 | 1.417373  |
| 17               | 1                | 0              | 0.560344                | -1.922290 | 0.689901  |
| 18               | 8                | 0              | 1.759224                | 1.764344  | 0.294081  |
| 19               | 1                | 0              | 0.944656                | 2.145945  | -0.056813 |

HF=-596.6702765

# 15g

| Center<br>Number | Atomic<br>Number | Atomic<br>Type | Coordinates (Angstroms) |           |           |
|------------------|------------------|----------------|-------------------------|-----------|-----------|
|                  |                  |                | X                       | Y         | Z         |
| 1                | 6                | 0              | 2.372308                | -0.887381 | -0.022334 |
| 2                | 1                | 0              | 2.201163                | -1.717458 | -0.726741 |
| 3                | 1                | 0              | 2.324305                | -1.311386 | 0.987314  |
| 4                | 8                | 0              | 3.606045                | -0.280268 | -0.246921 |
| 5                | 1                | 0              | 3.429136                | 0.598548  | -0.602415 |
| 6                | 6                | 0              | 1.218814                | 0.067088  | -0.189553 |
| 7                | 8                | 0              | 1.409392                | 1.194261  | -0.596996 |
| 8                | 6                | 0              | -0.170679               | -0.431038 | 0.216465  |
| 9                | 1                | 0              | -0.315803               | -1.448993 | -0.157032 |
| 10               | 6                | 0              | -1.270118               | 0.482660  | -0.329594 |
| 11               | 1                | 0              | -1.126114               | 0.610208  | -1.408849 |
| 12               | 6                | 0              | -2.655642               | -0.092399 | -0.089472 |
| 13               | 1                | 0              | -2.818880               | -0.298651 | 0.970472  |
| 14               | 1                | 0              | -3.415236               | 0.598880  | -0.457718 |
| 15               | 9                | 0              | -2.771804               | -1.289763 | -0.786755 |
| 16               | 8                | 0              | -0.208646               | -0.498487 | 1.627500  |
| 17               | 1                | 0              | -0.397815               | 0.393900  | 1.941188  |
| 18               | 8                | 0              | -1.237165               | 1.728356  | 0.341253  |
| 19               | 1                | 0              | -0.459629               | 2.198354  | 0.022819  |

HF=-596.6701092

**1w**

| Center<br>Number | Atomic<br>Number | Atomic<br>Type | Coordinates (Angstroms) |           |           |
|------------------|------------------|----------------|-------------------------|-----------|-----------|
|                  |                  |                | X                       | Y         | Z         |
| 1                | 6                | 0              | -1.905284               | -1.102935 | -0.324294 |
| 2                | 1                | 0              | -1.352492               | -1.749282 | 0.372738  |
| 3                | 1                | 0              | -1.678564               | -1.446804 | -1.338186 |
| 4                | 8                | 0              | -3.285580               | -1.174641 | -0.098977 |
| 5                | 1                | 0              | -3.533483               | -0.394049 | 0.410690  |
| 6                | 6                | 0              | -1.378782               | 0.296556  | -0.133522 |
| 7                | 8                | 0              | -2.076815               | 1.154950  | 0.360708  |
| 8                | 6                | 0              | 0.037210                | 0.639163  | -0.571468 |
| 9                | 1                | 0              | 0.051416                | 0.563387  | -1.668421 |
| 10               | 6                | 0              | 1.063252                | -0.341568 | 0.010716  |
| 11               | 1                | 0              | 0.822113                | -1.355494 | -0.319069 |
| 12               | 6                | 0              | 2.454616                | -0.003235 | -0.494967 |
| 13               | 1                | 0              | 2.473703                | 0.028079  | -1.586368 |
| 14               | 1                | 0              | 2.807625                | 0.946101  | -0.088010 |
| 15               | 9                | 0              | 3.347919                | -0.995918 | -0.084158 |
| 16               | 8                | 0              | 0.366123                | 1.941241  | -0.160515 |
| 17               | 1                | 0              | -0.449071               | 2.355706  | 0.152264  |
| 18               | 8                | 0              | 0.994289                | -0.354237 | 1.420343  |
| 19               | 1                | 0              | 1.117264                | 0.549236  | 1.730518  |

HF=-596.6863118

**2w**

| Center<br>Number | Atomic<br>Number | Atomic<br>Type | Coordinates (Angstroms) |           |           |
|------------------|------------------|----------------|-------------------------|-----------|-----------|
|                  |                  |                | X                       | Y         | Z         |
| 1                | 6                | 0              | -1.898019               | 1.089599  | 0.038682  |
| 2                | 1                | 0              | -1.520246               | 1.482340  | -0.916764 |
| 3                | 1                | 0              | -1.562810               | 1.771946  | 0.825666  |
| 4                | 8                | 0              | -3.296638               | 1.017890  | 0.040071  |
| 5                | 1                | 0              | -3.536848               | 0.100101  | -0.134420 |
| 6                | 6                | 0              | -1.267403               | -0.265252 | 0.237609  |
| 7                | 8                | 0              | -1.941019               | -1.271356 | 0.177429  |
| 8                | 6                | 0              | 0.221545                | -0.372847 | 0.522622  |
| 9                | 1                | 0              | 0.392911                | 0.097277  | 1.500680  |
| 10               | 6                | 0              | 1.063774                | 0.360744  | -0.528376 |
| 11               | 1                | 0              | 0.746565                | 1.404240  | -0.591501 |
| 12               | 6                | 0              | 2.546867                | 0.332725  | -0.178317 |
| 13               | 1                | 0              | 2.908382                | -0.690598 | -0.060138 |
| 14               | 1                | 0              | 3.119473                | 0.848839  | -0.949501 |
| 15               | 9                | 0              | 2.749691                | 1.001034  | 1.033567  |
| 16               | 8                | 0              | 0.607220                | -1.723635 | 0.547337  |
| 17               | 1                | 0              | -0.203029               | -2.249336 | 0.505460  |
| 18               | 8                | 0              | 0.869712                | -0.208337 | -1.804157 |
| 19               | 1                | 0              | 0.993595                | -1.160416 | -1.720341 |

HF=-596.6863471

## 3w

| Center<br>Number | Atomic<br>Number | Atomic<br>Type | Coordinates (Angstroms) |           |           |
|------------------|------------------|----------------|-------------------------|-----------|-----------|
|                  |                  |                | X                       | Y         | Z         |
| 1                | 6                | 0              | -2.395166               | 0.512696  | 0.283030  |
| 2                | 1                | 0              | -2.607226               | 1.406562  | -0.314305 |
| 3                | 1                | 0              | -2.005223               | 0.860994  | 1.248670  |
| 4                | 8                | 0              | -3.549299               | -0.261689 | 0.457542  |
| 5                | 1                | 0              | -3.345995               | -1.142738 | 0.116584  |
| 6                | 6                | 0              | -1.303741               | -0.273554 | -0.398078 |
| 7                | 8                | 0              | -1.486666               | -1.430089 | -0.707043 |
| 8                | 6                | 0              | 0.025510                | 0.420071  | -0.691330 |
| 9                | 1                | 0              | 0.158355                | 0.373972  | -1.776364 |
| 10               | 6                | 0              | 1.163094                | -0.344759 | -0.011255 |
| 11               | 1                | 0              | 1.049243                | -1.411670 | -0.231124 |
| 12               | 6                | 0              | 2.515517                | 0.127293  | -0.505395 |
| 13               | 1                | 0              | 2.647888                | -0.099904 | -1.564185 |
| 14               | 1                | 0              | 2.666818                | 1.191361  | -0.319136 |
| 15               | 9                | 0              | 3.504233                | -0.565044 | 0.209223  |
| 16               | 8                | 0              | 0.020392                | 1.777889  | -0.322534 |
| 17               | 1                | 0              | 0.237985                | 1.827978  | 0.615141  |
| 18               | 8                | 0              | 1.001165                | -0.098040 | 1.375475  |
| 19               | 1                | 0              | 1.744046                | -0.476198 | 1.852372  |

HF=-596.6853951

## 4w

| Center<br>Number | Atomic<br>Number | Atomic<br>Type | Coordinates (Angstroms) |           |           |
|------------------|------------------|----------------|-------------------------|-----------|-----------|
|                  |                  |                | X                       | Y         | Z         |
| 1                | 6                | 0              | -1.925439               | -1.024399 | -0.462780 |
| 2                | 1                | 0              | -1.333579               | -1.776224 | 0.077942  |
| 3                | 1                | 0              | -1.784243               | -1.202744 | -1.532919 |
| 4                | 8                | 0              | -3.286161               | -1.122760 | -0.143286 |
| 5                | 1                | 0              | -3.482140               | -0.424381 | 0.492661  |
| 6                | 6                | 0              | -1.361615               | 0.325844  | -0.097757 |
| 7                | 8                | 0              | -2.010951               | 1.106434  | 0.562971  |
| 8                | 6                | 0              | 0.038586                | 0.710486  | -0.557545 |
| 9                | 1                | 0              | 0.026765                | 0.716847  | -1.655822 |
| 10               | 6                | 0              | 1.052667                | -0.343351 | -0.104612 |
| 11               | 1                | 0              | 0.847036                | -1.273131 | -0.651987 |
| 12               | 6                | 0              | 2.465216                | 0.094846  | -0.433433 |
| 13               | 1                | 0              | 2.593579                | 0.252770  | -1.505693 |
| 14               | 1                | 0              | 2.741091                | 0.989339  | 0.124547  |
| 15               | 9                | 0              | 3.340185                | -0.931373 | -0.045242 |
| 16               | 8                | 0              | 0.367274                | 1.989118  | -0.087236 |
| 17               | 1                | 0              | -0.361469               | 2.277858  | 0.477822  |
| 18               | 8                | 0              | 0.877154                | -0.541004 | 1.284670  |
| 19               | 1                | 0              | 1.496275                | -1.212834 | 1.580438  |

HF=-596.6855755

## 5w

| Center<br>Number | Atomic<br>Number | Atomic<br>Type | Coordinates (Angstroms) |           |           |
|------------------|------------------|----------------|-------------------------|-----------|-----------|
|                  |                  |                | X                       | Y         | Z         |
| 1                | 6                | 0              | -1.785547               | -0.957147 | -0.398776 |
| 2                | 1                | 0              | -1.003479               | -1.721808 | -0.361604 |
| 3                | 1                | 0              | -2.095325               | -0.873351 | -1.449153 |
| 4                | 8                | 0              | -2.866336               | -1.304774 | 0.422963  |
| 5                | 1                | 0              | -3.045169               | -0.546368 | 0.992678  |
| 6                | 6                | 0              | -1.190361               | 0.367690  | -0.003306 |
| 7                | 8                | 0              | -1.689014               | 1.021181  | 0.889831  |
| 8                | 6                | 0              | 0.019391                | 0.920760  | -0.748906 |
| 9                | 1                | 0              | -0.212397               | 0.892298  | -1.820090 |
| 10               | 6                | 0              | 1.295161                | 0.076405  | -0.558110 |
| 11               | 1                | 0              | 2.110524                | 0.664916  | -0.994272 |
| 12               | 6                | 0              | 1.609951                | -0.166868 | 0.903961  |
| 13               | 1                | 0              | 1.672194                | 0.772657  | 1.454540  |
| 14               | 1                | 0              | 0.884367                | -0.837954 | 1.370537  |
| 15               | 9                | 0              | 2.858983                | -0.796984 | 0.986045  |
| 16               | 8                | 0              | 0.269120                | 2.239282  | -0.346184 |
| 17               | 1                | 0              | -0.334903               | 2.434681  | 0.382550  |
| 18               | 8                | 0              | 1.120650                | -1.131675 | -1.268888 |
| 19               | 1                | 0              | 1.926411                | -1.649364 | -1.200542 |

HF=-596.683772

## 6w

| Center<br>Number | Atomic<br>Number | Atomic<br>Type | Coordinates (Angstroms) |           |           |
|------------------|------------------|----------------|-------------------------|-----------|-----------|
|                  |                  |                | X                       | Y         | Z         |
| 1                | 6                | 0              | -2.268780               | 0.736695  | 0.160330  |
| 2                | 1                | 0              | -2.291209               | 1.600796  | -0.514272 |
| 3                | 1                | 0              | -1.904260               | 1.101022  | 1.128189  |
| 4                | 8                | 0              | -3.538953               | 0.157830  | 0.283504  |
| 5                | 1                | 0              | -3.459122               | -0.755045 | -0.022783 |
| 6                | 6                | 0              | -1.265396               | -0.253237 | -0.374556 |
| 7                | 8                | 0              | -1.606768               | -1.383246 | -0.644877 |
| 8                | 6                | 0              | 0.171719                | 0.198390  | -0.580943 |
| 9                | 1                | 0              | 0.353037                | 0.154762  | -1.662366 |
| 10               | 6                | 0              | 1.135520                | -0.764315 | 0.136542  |
| 11               | 1                | 0              | 0.831242                | -1.787192 | -0.102106 |
| 12               | 6                | 0              | 2.568108                | -0.622164 | -0.337392 |
| 13               | 1                | 0              | 3.231216                | -1.243000 | 0.265436  |
| 14               | 1                | 0              | 2.660744                | -0.879123 | -1.394114 |
| 15               | 9                | 0              | 3.003239                | 0.710789  | -0.194666 |
| 16               | 8                | 0              | 0.296121                | 1.516785  | -0.089760 |
| 17               | 1                | 0              | 1.143580                | 1.871895  | -0.371124 |
| 18               | 8                | 0              | 1.014646                | -0.611916 | 1.534980  |
| 19               | 1                | 0              | 1.038229                | 0.330941  | 1.730469  |

HF=-596.6852339



7w

| Center<br>Number | Atomic<br>Number | Atomic<br>Type | Coordinates (Angstroms) |           |           |
|------------------|------------------|----------------|-------------------------|-----------|-----------|
|                  |                  |                | X                       | Y         | Z         |
| 1                | 6                | 0              | -2.341759               | -0.524489 | 0.261051  |
| 2                | 1                | 0              | -2.394360               | -0.910841 | 1.285406  |
| 3                | 1                | 0              | -2.125138               | -1.381526 | -0.388932 |
| 4                | 8                | 0              | -3.542703               | 0.098788  | -0.103545 |
| 5                | 1                | 0              | -3.316639               | 1.001955  | -0.362922 |
| 6                | 6                | 0              | -1.180757               | 0.432654  | 0.167699  |
| 7                | 8                | 0              | -1.358064               | 1.571654  | -0.205036 |
| 8                | 6                | 0              | 0.206248                | -0.059683 | 0.551414  |
| 9                | 1                | 0              | 0.528795                | 0.546941  | 1.403614  |
| 10               | 6                | 0              | 1.184098                | 0.151375  | -0.612839 |
| 11               | 1                | 0              | 1.058748                | 1.164975  | -0.997916 |
| 12               | 6                | 0              | 2.631369                | -0.049843 | -0.185643 |
| 13               | 1                | 0              | 2.787161                | -1.042426 | 0.244297  |
| 14               | 1                | 0              | 3.296620                | 0.096350  | -1.037070 |
| 15               | 9                | 0              | 2.963593                | 0.894369  | 0.792304  |
| 16               | 8                | 0              | 0.163358                | -1.436422 | 0.874532  |
| 17               | 1                | 0              | 0.535246                | -1.583322 | 1.745057  |
| 18               | 8                | 0              | 0.882026                | -0.736656 | -1.668540 |
| 19               | 1                | 0              | 0.805101                | -1.620420 | -1.291648 |

HF=-596.6843881

8w

| Center<br>Number | Atomic<br>Number | Atomic<br>Type | Coordinates (Angstroms) |           |           |
|------------------|------------------|----------------|-------------------------|-----------|-----------|
|                  |                  |                | X                       | Y         | Z         |
| 1                | 6                | 0              | -1.919051               | -0.990985 | -0.401718 |
| 2                | 1                | 0              | -1.510190               | -1.689554 | 0.341903  |
| 3                | 1                | 0              | -1.647746               | -1.370878 | -1.391644 |
| 4                | 8                | 0              | -3.312978               | -0.898889 | -0.294359 |
| 5                | 1                | 0              | -3.509595               | -0.070111 | 0.158850  |
| 6                | 6                | 0              | -1.252269               | 0.342982  | -0.174294 |
| 7                | 8                | 0              | -1.893349               | 1.287536  | 0.232314  |
| 8                | 6                | 0              | 0.235132                | 0.497694  | -0.450626 |
| 9                | 1                | 0              | 0.394741                | 0.282267  | -1.514640 |
| 10               | 6                | 0              | 1.035295                | -0.530631 | 0.357638  |
| 11               | 1                | 0              | 0.774619                | -1.532272 | -0.005912 |
| 12               | 6                | 0              | 2.535559                | -0.329612 | 0.194147  |
| 13               | 1                | 0              | 2.820958                | 0.688850  | 0.458480  |
| 14               | 1                | 0              | 3.086028                | -1.048655 | 0.803606  |
| 15               | 9                | 0              | 2.886689                | -0.547006 | -1.142469 |
| 16               | 8                | 0              | 0.644759                | 1.809563  | -0.176920 |
| 17               | 1                | 0              | -0.103085               | 2.259774  | 0.236230  |
| 18               | 8                | 0              | 0.679057                | -0.372192 | 1.717665  |
| 19               | 1                | 0              | 0.966165                | -1.141203 | 2.214863  |

HF=-596.6842887

## 9w

| Center<br>Number | Atomic<br>Number | Atomic<br>Type | Coordinates (Angstroms) |           |           |
|------------------|------------------|----------------|-------------------------|-----------|-----------|
|                  |                  |                | X                       | Y         | Z         |
| 1                | 6                | 0              | -2.351755               | 0.499185  | -0.305114 |
| 2                | 1                | 0              | -2.412246               | 0.798524  | -1.357745 |
| 3                | 1                | 0              | -2.142114               | 1.408430  | 0.272868  |
| 4                | 8                | 0              | -3.545943               | -0.098913 | 0.118435  |
| 5                | 1                | 0              | -3.313347               | -0.982257 | 0.434740  |
| 6                | 6                | 0              | -1.182846               | -0.439767 | -0.142438 |
| 7                | 8                | 0              | -1.353820               | -1.549686 | 0.312140  |
| 8                | 6                | 0              | 0.202268                | 0.031516  | -0.576306 |
| 9                | 1                | 0              | 0.514529                | -0.638913 | -1.382281 |
| 10               | 6                | 0              | 1.185891                | -0.106107 | 0.586450  |
| 11               | 1                | 0              | 1.062957                | -1.097795 | 1.031998  |
| 12               | 6                | 0              | 2.630513                | 0.082750  | 0.145101  |
| 13               | 1                | 0              | 2.761658                | 1.026470  | -0.386929 |
| 14               | 1                | 0              | 3.301965                | 0.042514  | 1.004966  |
| 15               | 9                | 0              | 2.983775                | -0.955875 | -0.721123 |
| 16               | 8                | 0              | 0.191084                | 1.339165  | -1.096595 |
| 17               | 1                | 0              | 0.234541                | 1.953705  | -0.355791 |
| 18               | 8                | 0              | 0.828448                | 0.921164  | 1.496783  |
| 19               | 1                | 0              | 1.275500                | 0.792884  | 2.336007  |

HF=-596.6841084

## 10w

| Center<br>Number | Atomic<br>Number | Atomic<br>Type | Coordinates (Angstroms) |           |           |
|------------------|------------------|----------------|-------------------------|-----------|-----------|
|                  |                  |                | X                       | Y         | Z         |
| 1                | 6                | 0              | -1.636671               | -0.693917 | -0.617861 |
| 2                | 1                | 0              | -1.001337               | -1.570102 | -0.465719 |
| 3                | 1                | 0              | -1.782980               | -0.583674 | -1.700637 |
| 4                | 8                | 0              | -2.865751               | -0.844166 | 0.042210  |
| 5                | 1                | 0              | -2.989582               | -0.057380 | 0.587650  |
| 6                | 6                | 0              | -0.897278               | 0.526267  | -0.135975 |
| 7                | 8                | 0              | -1.410498               | 1.272986  | 0.672748  |
| 8                | 6                | 0              | 0.464048                | 0.883705  | -0.718872 |
| 9                | 1                | 0              | 0.329256                | 0.955379  | -1.806643 |
| 10               | 6                | 0              | 1.568505                | -0.173099 | -0.468868 |
| 11               | 1                | 0              | 2.499750                | 0.281082  | -0.828353 |
| 12               | 6                | 0              | 1.787973                | -0.472614 | 0.994247  |
| 13               | 1                | 0              | 2.584631                | -1.206908 | 1.115752  |
| 14               | 1                | 0              | 2.023951                | 0.441770  | 1.539658  |
| 15               | 9                | 0              | 0.625583                | -1.017620 | 1.561975  |
| 16               | 8                | 0              | 0.890845                | 2.119400  | -0.213550 |
| 17               | 1                | 0              | 0.218342                | 2.412401  | 0.416449  |
| 18               | 8                | 0              | 1.300001                | -1.382575 | -1.144816 |
| 19               | 1                | 0              | 1.451486                | -1.261194 | -2.084709 |

HF=-596.6854536

## 11w

| Center<br>Number | Atomic<br>Number | Atomic<br>Type | Coordinates (Angstroms) |           |           |
|------------------|------------------|----------------|-------------------------|-----------|-----------|
|                  |                  |                | X                       | Y         | Z         |
| 1                | 6                | 0              | 1.925759                | -0.773292 | -0.702632 |
| 2                | 1                | 0              | 2.943423                | -0.538037 | -1.019085 |
| 3                | 1                | 0              | 1.395503                | -1.170028 | -1.580505 |
| 4                | 8                | 0              | 1.993278                | -1.707526 | 0.340848  |
| 5                | 1                | 0              | 1.089849                | -2.001768 | 0.524133  |
| 6                | 6                | 0              | 1.255095                | 0.541116  | -0.349308 |
| 7                | 8                | 0              | 1.448306                | 1.538003  | -1.010688 |
| 8                | 6                | 0              | 0.297906                | 0.627856  | 0.842378  |
| 9                | 1                | 0              | 0.791250                | 0.175206  | 1.708548  |
| 10               | 6                | 0              | -1.015215               | -0.151013 | 0.609238  |
| 11               | 1                | 0              | -1.665579               | 0.087190  | 1.457617  |
| 12               | 6                | 0              | -1.715239               | 0.265145  | -0.667763 |
| 13               | 1                | 0              | -1.897123               | 1.340107  | -0.685527 |
| 14               | 1                | 0              | -1.159013               | -0.043336 | -1.556434 |
| 15               | 9                | 0              | -2.955697               | -0.383680 | -0.716225 |
| 16               | 8                | 0              | -0.004210               | 1.968768  | 1.110901  |
| 17               | 1                | 0              | 0.338580                | 2.485883  | 0.368439  |
| 18               | 8                | 0              | -0.713014               | -1.536484 | 0.602932  |
| 19               | 1                | 0              | -1.520331               | -2.043054 | 0.485418  |

HF=-596.6857057

## 12w

| Center<br>Number | Atomic<br>Number | Atomic<br>Type | Coordinates (Angstroms) |           |           |
|------------------|------------------|----------------|-------------------------|-----------|-----------|
|                  |                  |                | X                       | Y         | Z         |
| 1                | 6                | 0              | 2.140313                | 0.985445  | 0.328551  |
| 2                | 1                | 0              | 3.227448                | 0.875800  | 0.374592  |
| 3                | 1                | 0              | 1.797650                | 1.313697  | 1.315440  |
| 4                | 8                | 0              | 1.727162                | 1.958857  | -0.602397 |
| 5                | 1                | 0              | 2.237031                | 1.860648  | -1.409390 |
| 6                | 6                | 0              | 1.537384                | -0.387961 | 0.105256  |
| 7                | 8                | 0              | 2.056408                | -1.383233 | 0.557101  |
| 8                | 6                | 0              | 0.222313                | -0.510848 | -0.657985 |
| 9                | 1                | 0              | 0.345008                | -0.032038 | -1.635548 |
| 10               | 6                | 0              | -0.872338               | 0.251239  | 0.100597  |
| 11               | 1                | 0              | -0.629972               | 1.319563  | 0.056881  |
| 12               | 6                | 0              | -2.220464               | 0.032212  | -0.553248 |
| 13               | 1                | 0              | -2.219541               | 0.377500  | -1.588797 |
| 14               | 1                | 0              | -2.523454               | -1.013023 | -0.494202 |
| 15               | 9                | 0              | -3.175256               | 0.787837  | 0.146920  |
| 16               | 8                | 0              | -0.099029               | -1.862898 | -0.842237 |
| 17               | 1                | 0              | 0.475991                | -2.367075 | -0.250861 |
| 18               | 8                | 0              | -0.865378               | -0.204038 | 1.442082  |
| 19               | 1                | 0              | -1.529397               | 0.284377  | 1.934194  |

HF=-596.6839504

### 13w

| Center<br>Number | Atomic<br>Number | Atomic<br>Type | Coordinates (Angstroms) |           |           |
|------------------|------------------|----------------|-------------------------|-----------|-----------|
|                  |                  |                | X                       | Y         | Z         |
| 1                | 6                | 0              | 1.982718                | 0.436356  | -0.356053 |
| 2                | 1                | 0              | 2.357535                | 1.407239  | -0.009660 |
| 3                | 1                | 0              | 1.580458                | 0.591394  | -1.363625 |
| 4                | 8                | 0              | 3.004245                | -0.522381 | -0.358682 |
| 5                | 1                | 0              | 2.717154                | -1.238320 | 0.223052  |
| 6                | 6                | 0              | 0.842959                | 0.022106  | 0.536975  |
| 7                | 8                | 0              | 0.902482                | -1.024053 | 1.155009  |
| 8                | 6                | 0              | -0.370360               | 0.933452  | 0.654698  |
| 9                | 1                | 0              | -0.442565               | 1.211236  | 1.711458  |
| 10               | 6                | 0              | -1.680982               | 0.192550  | 0.296426  |
| 11               | 1                | 0              | -2.489264               | 0.910465  | 0.463278  |
| 12               | 6                | 0              | -1.754277               | -0.192607 | -1.167601 |
| 13               | 1                | 0              | -2.688514               | -0.716845 | -1.371051 |
| 14               | 1                | 0              | -1.660370               | 0.685749  | -1.807140 |
| 15               | 9                | 0              | -0.702367               | -1.066312 | -1.493144 |
| 16               | 8                | 0              | -0.254421               | 2.064591  | -0.177236 |
| 17               | 1                | 0              | -0.012451               | 2.829453  | 0.346994  |
| 18               | 8                | 0              | -1.911936               | -0.899386 | 1.155722  |
| 19               | 1                | 0              | -1.083990               | -1.384868 | 1.259819  |

HF=-596.6843657

### 14w

| Center<br>Number | Atomic<br>Number | Atomic<br>Type | Coordinates (Angstroms) |           |           |
|------------------|------------------|----------------|-------------------------|-----------|-----------|
|                  |                  |                | X                       | Y         | Z         |
| 1                | 6                | 0              | -2.486369               | 0.521949  | 0.119741  |
| 2                | 1                | 0              | -2.648349               | 1.320040  | -0.613817 |
| 3                | 1                | 0              | -2.229344               | 1.011148  | 1.068215  |
| 4                | 8                | 0              | -3.631604               | -0.272942 | 0.259326  |
| 5                | 1                | 0              | -3.360907               | -1.182997 | 0.079528  |
| 6                | 6                | 0              | -1.299661               | -0.299017 | -0.319912 |
| 7                | 8                | 0              | -1.408951               | -1.496301 | -0.468668 |
| 8                | 6                | 0              | 0.017553                | 0.420712  | -0.600025 |
| 9                | 1                | 0              | 0.133058                | 0.397065  | -1.689215 |
| 10               | 6                | 0              | 1.198829                | -0.311814 | 0.057871  |
| 11               | 1                | 0              | 1.092624                | -1.386063 | -0.113602 |
| 12               | 6                | 0              | 2.509279                | 0.160380  | -0.533224 |
| 13               | 1                | 0              | 2.514566                | 0.021842  | -1.615825 |
| 14               | 1                | 0              | 2.700890                | 1.206500  | -0.287792 |
| 15               | 9                | 0              | 3.557663                | -0.596769 | -0.005333 |
| 16               | 8                | 0              | -0.018275               | 1.771961  | -0.210380 |
| 17               | 1                | 0              | 0.208618                | 1.800977  | 0.727112  |
| 18               | 8                | 0              | 1.204639                | -0.010350 | 1.446271  |
| 19               | 1                | 0              | 0.765625                | -0.709803 | 1.934291  |

HF=-596.6844086

## 15w

| Center<br>Number | Atomic<br>Number | Atomic<br>Type | Coordinates (Angstroms) |           |           |
|------------------|------------------|----------------|-------------------------|-----------|-----------|
|                  |                  |                | X                       | Y         | Z         |
| 1                | 6                | 0              | 2.354288                | 0.468601  | -0.200386 |
| 2                | 1                | 0              | 2.622392                | 1.216885  | 0.553833  |
| 3                | 1                | 0              | 2.093788                | 1.018822  | -1.112907 |
| 4                | 8                | 0              | 3.414468                | -0.418097 | -0.432385 |
| 5                | 1                | 0              | 3.091920                | -1.300597 | -0.206454 |
| 6                | 6                | 0              | 1.125392                | -0.264309 | 0.278268  |
| 7                | 8                | 0              | 1.160174                | -1.465568 | 0.440873  |
| 8                | 6                | 0              | -0.142036               | 0.528801  | 0.522019  |
| 9                | 1                | 0              | -0.565629               | 0.184663  | 1.474363  |
| 10               | 6                | 0              | -1.180140               | 0.280603  | -0.604484 |
| 11               | 1                | 0              | -0.697811               | 0.437473  | -1.573642 |
| 12               | 6                | 0              | -1.776406               | -1.109714 | -0.598543 |
| 13               | 1                | 0              | -2.484517               | -1.219588 | -1.420434 |
| 14               | 1                | 0              | -1.008855               | -1.880952 | -0.646147 |
| 15               | 9                | 0              | -2.494808               | -1.289568 | 0.594817  |
| 16               | 8                | 0              | 0.176569                | 1.898061  | 0.577798  |
| 17               | 1                | 0              | -0.630856               | 2.377926  | 0.359250  |
| 18               | 8                | 0              | -2.183981               | 1.275002  | -0.506597 |
| 19               | 1                | 0              | -2.791608               | 1.032398  | 0.200017  |

HF=-596.6841611

## 16w

| Center<br>Number | Atomic<br>Number | Atomic<br>Type | Coordinates (Angstroms) |           |           |
|------------------|------------------|----------------|-------------------------|-----------|-----------|
|                  |                  |                | X                       | Y         | Z         |
| 1                | 6                | 0              | 2.346530                | 0.296784  | -0.479175 |
| 2                | 1                | 0              | 2.755139                | 1.195633  | -0.003416 |
| 3                | 1                | 0              | 1.941770                | 0.610412  | -1.449306 |
| 4                | 8                | 0              | 3.333363                | -0.685120 | -0.637157 |
| 5                | 1                | 0              | 3.041152                | -1.457508 | -0.135664 |
| 6                | 6                | 0              | 1.204487                | -0.206555 | 0.367403  |
| 7                | 8                | 0              | 1.240335                | -1.322785 | 0.838084  |
| 8                | 6                | 0              | 0.013270                | 0.706331  | 0.591745  |
| 9                | 1                | 0              | -0.244847               | 0.651145  | 1.658254  |
| 10               | 6                | 0              | -1.202251               | 0.237962  | -0.238715 |
| 11               | 1                | 0              | -0.892509               | 0.086593  | -1.280099 |
| 12               | 6                | 0              | -1.812884               | -1.040196 | 0.296649  |
| 13               | 1                | 0              | -1.095977               | -1.860594 | 0.302082  |
| 14               | 1                | 0              | -2.224583               | -0.885592 | 1.295961  |
| 15               | 9                | 0              | -2.874783               | -1.401350 | -0.543104 |
| 16               | 8                | 0              | 0.363984                | 2.017286  | 0.228425  |
| 17               | 1                | 0              | -0.463261               | 2.478558  | 0.044553  |
| 18               | 8                | 0              | -2.125099               | 1.312054  | -0.163541 |
| 19               | 1                | 0              | -2.739419               | 1.256059  | -0.898360 |

HF=-596.6834475

## 17w

| Center<br>Number | Atomic<br>Number | Atomic<br>Type | Coordinates (Angstroms) |           |           |
|------------------|------------------|----------------|-------------------------|-----------|-----------|
|                  |                  |                | X                       | Y         | Z         |
| 1                | 6                | 0              | 1.883021                | 0.302328  | 0.602080  |
| 2                | 1                | 0              | 2.806732                | -0.186581 | 0.914785  |
| 3                | 1                | 0              | 1.442079                | 0.783754  | 1.485124  |
| 4                | 8                | 0              | 2.193907                | 1.230149  | -0.405488 |
| 5                | 1                | 0              | 1.394508                | 1.748908  | -0.573907 |
| 6                | 6                | 0              | 0.914611                | -0.789456 | 0.187703  |
| 7                | 8                | 0              | 0.919990                | -1.871193 | 0.734444  |
| 8                | 6                | 0              | -0.083329               | -0.552354 | -0.950471 |
| 9                | 1                | 0              | 0.496036                | -0.228969 | -1.823299 |
| 10               | 6                | 0              | -1.130552               | 0.549543  | -0.672923 |
| 11               | 1                | 0              | -1.816250               | 0.524543  | -1.527795 |
| 12               | 6                | 0              | -1.968665               | 0.294963  | 0.562322  |
| 13               | 1                | 0              | -2.722099               | 1.075370  | 0.685692  |
| 14               | 1                | 0              | -2.452078               | -0.681084 | 0.497989  |
| 15               | 9                | 0              | -1.165264               | 0.304828  | 1.709465  |
| 16               | 8                | 0              | -0.757576               | -1.745663 | -1.238501 |
| 17               | 1                | 0              | -0.489455               | -2.383444 | -0.561346 |
| 18               | 8                | 0              | -0.453842               | 1.793673  | -0.616788 |
| 19               | 1                | 0              | -1.082441               | 2.518167  | -0.644028 |

HF=-596.6864921

## 18w

| Center<br>Number | Atomic<br>Number | Atomic<br>Type | Coordinates (Angstroms) |           |           |
|------------------|------------------|----------------|-------------------------|-----------|-----------|
|                  |                  |                | X                       | Y         | Z         |
| 1                | 6                | 0              | 2.277622                | 0.368083  | -0.543736 |
| 2                | 1                | 0              | 2.511926                | 1.424812  | -0.374115 |
| 3                | 1                | 0              | 1.775034                | 0.303482  | -1.516670 |
| 4                | 8                | 0              | 3.442773                | -0.411041 | -0.515600 |
| 5                | 1                | 0              | 3.305077                | -1.087175 | 0.161233  |
| 6                | 6                | 0              | 1.291639                | -0.088560 | 0.500731  |
| 7                | 8                | 0              | 1.555094                | -1.023724 | 1.223966  |
| 8                | 6                | 0              | -0.049862               | 0.632179  | 0.603895  |
| 9                | 1                | 0              | -0.211364               | 0.859008  | 1.663295  |
| 10               | 6                | 0              | -1.149792               | -0.331009 | 0.158907  |
| 11               | 1                | 0              | -1.140423               | -1.178993 | 0.854377  |
| 12               | 6                | 0              | -2.508173               | 0.336703  | 0.220213  |
| 13               | 1                | 0              | -2.727506               | 0.698231  | 1.226460  |
| 14               | 1                | 0              | -2.584565               | 1.145784  | -0.505637 |
| 15               | 9                | 0              | -3.479768               | -0.620172 | -0.111984 |
| 16               | 8                | 0              | -0.093668               | 1.799249  | -0.187916 |
| 17               | 1                | 0              | 0.203101                | 2.548153  | 0.331929  |
| 18               | 8                | 0              | -0.840684               | -0.766267 | -1.152424 |
| 19               | 1                | 0              | -1.490086               | -1.421865 | -1.417301 |

HF=-596.6832413

## 19w

| Center<br>Number | Atomic<br>Number | Atomic<br>Type | Coordinates (Angstroms) |           |           |
|------------------|------------------|----------------|-------------------------|-----------|-----------|
|                  |                  |                | X                       | Y         | Z         |
| 1                | 6                | 0              | -2.277406               | 0.367861  | 0.543967  |
| 2                | 1                | 0              | -2.511746               | 1.424663  | 0.374847  |
| 3                | 1                | 0              | -1.774603               | 0.302837  | 1.516778  |
| 4                | 8                | 0              | -3.442518               | -0.411286 | 0.515702  |
| 5                | 1                | 0              | -3.304967               | -1.087092 | -0.161497 |
| 6                | 6                | 0              | -1.291607               | -0.088289 | -0.500866 |
| 7                | 8                | 0              | -1.555194               | -1.023143 | -1.224470 |
| 8                | 6                | 0              | 0.049915                | 0.632425  | -0.603860 |
| 9                | 1                | 0              | 0.211523                | 0.859468  | -1.663196 |
| 10               | 6                | 0              | 1.149731                | -0.330982 | -0.158962 |
| 11               | 1                | 0              | 1.140440                | -1.178731 | -0.854718 |
| 12               | 6                | 0              | 2.508121                | 0.336720  | -0.219803 |
| 13               | 1                | 0              | 2.727474                | 0.698882  | -1.225819 |
| 14               | 1                | 0              | 2.584543                | 1.145345  | 0.506562  |
| 15               | 9                | 0              | 3.479716                | -0.620386 | 0.111805  |
| 16               | 8                | 0              | 0.093767                | 1.799312  | 0.188194  |
| 17               | 1                | 0              | -0.202733               | 2.548366  | -0.331594 |
| 18               | 8                | 0              | 0.840316                | -0.766601 | 1.152176  |
| 19               | 1                | 0              | 1.489125                | -1.422922 | 1.416720  |

HF=-596.6832412

## 20w

| Center<br>Number | Atomic<br>Number | Atomic<br>Type | Coordinates (Angstroms) |           |           |
|------------------|------------------|----------------|-------------------------|-----------|-----------|
|                  |                  |                | X                       | Y         | Z         |
| 1                | 6                | 0              | -1.891856               | -0.602057 | 0.316149  |
| 2                | 1                | 0              | -2.938029               | -0.326015 | 0.159645  |
| 3                | 1                | 0              | -1.777847               | -0.902369 | 1.359107  |
| 4                | 8                | 0              | -1.513521               | -1.698070 | -0.491191 |
| 5                | 1                | 0              | -1.988011               | -1.670520 | -1.325274 |
| 6                | 6                | 0              | -1.057293               | 0.649924  | 0.127261  |
| 7                | 8                | 0              | -1.335396               | 1.647446  | 0.756484  |
| 8                | 6                | 0              | 0.102230                | 0.715483  | -0.875088 |
| 9                | 1                | 0              | -0.289156               | 0.391494  | -1.847939 |
| 10               | 6                | 0              | 1.329461                | -0.185746 | -0.561443 |
| 11               | 1                | 0              | 2.134401                | 0.236397  | -1.170450 |
| 12               | 6                | 0              | 1.791380                | -0.078054 | 0.877199  |
| 13               | 1                | 0              | 2.704886                | -0.653780 | 1.027735  |
| 14               | 1                | 0              | 1.946676                | 0.963033  | 1.166902  |
| 15               | 9                | 0              | 0.814190                | -0.616419 | 1.733427  |
| 16               | 8                | 0              | 0.545922                | 2.044267  | -0.953641 |
| 17               | 1                | 0              | 0.046769                | 2.542084  | -0.290085 |
| 18               | 8                | 0              | 1.167587                | -1.521049 | -0.968242 |
| 19               | 1                | 0              | 0.272335                | -1.810608 | -0.732226 |

HF=-596.6858806
